# Supplementary material for: Arthroplasty Rates Not Increasing in Young Patients With Rheumatoid Arthritis: A National Database Review, 2005 Versus 2014
Source: PubMed Central journal article supplement — Arthroplast Today. 2021 Mar 10;8:118–23. doi: 10.1016/j.artd.2021.02.002 (PMC7970009; doi:10.1016/j.artd.2021.02.002), 2021-03-10
Supplement: mmc1.pdf [file mmc1.pdf]

# CONFLICT OF INTEREST STATEMENT

## *American Association of Hip and Knee Surgeons*

(Adopted from the American Academy of Orthopaedic Surgeons disclosure statement)

The following form **must be filled out completely and submitted by each author (example, 6 authors, 6 forms).**  
**All items require a response. If there is no relevant disclosure for a given item, enter "None."**

Manuscript Title: Arthroplasty Rates Not Increasing in Young Rheumatoid Arthritis Patients: Results of a 10-Year National Database Review

1. Royalties from a company or supplier ("None")
2. Speakers bureau/paid presentations for a company or supplier ("None")
- 3A. Paid employee for a company or supplier ("None")
- 3B. Paid consultant for a company or supplier ("None")
- 3C. Unpaid consultants for a company or supplier ("None")
4. Stock or stock options in a company or supplier ("None")
5. Research support from a company or supplier as a Principal Investigator ("None")
6. Other financial or material support from a company or supplier ("None")
7. Royalties, financial or material support from publishers ("None")
8. Medical/Orthopaedic publications editorial/governing board ("None")
9. Board member/committee appointments for a society ("None")

**Each author must sign AND print or type his/her name, date and submit a separate form**

In addition, one BLINDED Conflict of Interest form (no author names used) should be submitted per manuscript with all author disclosures.

DJIBRIL M. BA

Author Name (Print or Type)

*Djibril Ba*

Author Signature

11/27/20

Date
