# Supplementary material for: Arthroplasty Rates Not Increasing in Young Patients With Rheumatoid Arthritis: A National Database Review, 2005 Versus 2014
Source: PubMed Central journal article supplement — Arthroplast Today. 2021 Mar 10;8:118–23. doi: 10.1016/j.artd.2021.02.002 (PMC7970009; doi:10.1016/j.artd.2021.02.002), 2021-03-10
Supplement: mmc6.pdf [file mmc6.pdf]

# CONFLICT OF INTEREST STATEMENT

## *American Association of Hip and Knee Surgeons*

(Adopted from the American Academy of Orthopaedic Surgeons disclosure statement)

The following form **must be filled out completely and submitted by each author (example, 6 authors, 6 forms).**  
**All items require a response. If there is no relevant disclosure for a given item, enter "None."**

Manuscript Title: **Arthroplasty Rates Not Increasing in Young Rheumatoid Arthritis Patients: Results of a 10-Year National Database Review**

---

1. Royalties from a company or supplier (The following conflicts were disclosed) -NONE
2. Speakers bureau/paid presentations for a company or supplier (The following conflicts were disclosed) -NONE
- 3A. Paid employee for a company or supplier (The following conflicts were disclosed) -Dr. June is employed by the Department of the Veteran Affairs. The views expressed in this article are those of the authors and Dr. June and do not necessarily reflect the position or policy of the Department of Veterans Affairs or the US government.
- 3B. Paid consultant for a company or supplier (The following conflicts were disclosed)-NONE
- 3C. Unpaid consultants for a company or supplier (The following conflicts were disclosed) -NONE
4. Stock or stock options in a company or supplier (The following conflicts were disclosed) -NONE
5. Research support from a company or supplier as a Principal Investigator (The following conflicts were disclosed) - NONE
6. Other financial or material support from a company or supplier (The following conflicts were disclosed) -NONE
7. Royalties, financial or material support from publishers (The following conflicts were disclosed)-NONE
8. Medical/Orthopaedic publications editorial/governing board (The following conflicts were disclosed)-NONE
9. Board member/committee appointments for a society (The following conflicts were disclosed)-NONE

**Each author must sign AND print or type his/her name, date and submit a separate form**

In addition, one BLINDED Conflict of Interest form (no author names used) should be submitted per manuscript with all author disclosures.

Rayford R. June MD

---

Author Name (Print or Type)

Author Signature

Date
