# Supplementary material for: Arthroplasty Rates Not Increasing in Young Patients With Rheumatoid Arthritis: A National Database Review, 2005 Versus 2014
Source: PubMed Central journal article supplement — Arthroplast Today. 2021 Mar 10;8:118–23. doi: 10.1016/j.artd.2021.02.002 (PMC7970009; doi:10.1016/j.artd.2021.02.002), 2021-03-10
Supplement: mmc7.pdf [file mmc7.pdf]

# CONFLICT OF INTEREST STATEMENT

## *American Association of Hip and Knee Surgeons*

(Adopted from the American Academy of Orthopaedic Surgeons disclosure statement)

The following form **must be filled out completely and submitted by each author (example, 6 authors, 6 forms).**  
**All items require a response. If there is no relevant disclosure for a given item, enter "None."**

Manuscript Title: Arthroplasty Rates Not Increasing in Young Rheumatoid Arthritis Patients: Results of a 10-Year National Database Review

1. Royalties from a company or supplier (The following conflicts were disclosed)  
None
2. Speakers bureau/paid presentations for a company or supplier (The following conflicts were disclosed)  
None
- 3A. Paid employee for a company or supplier (The following conflicts were disclosed)  
None
- 3B. Paid consultant for a company or supplier (The following conflicts were disclosed)  
None
- 3C. Unpaid consultants for a company or supplier (The following conflicts were disclosed)  
None
4. Stock or stock options in a company or supplier (The following conflicts were disclosed)  
None
5. Research support from a company or supplier as a Principal Investigator (The following conflicts were disclosed)  
None
6. Other financial or material support from a company or supplier (The following conflicts were disclosed)  
DePuy-Synthes (research support, non-primary investigator)
7. Royalties, financial or material support from publishers (The following conflicts were disclosed)  
None
8. Medical/Orthopaedic publications editorial/governing board (The following conflicts were disclosed)  
Journal of Arthroplasty, The Journal of Knee Surgery, The Journal of Hip Surgery,  
Case Connector Series of JBJS
9. Board member/committee appointments for a society (The following conflicts were disclosed)  
AAOS- Hip Program Committee, AAOS Orthopaedic Knowledge Update Committee

**Each author must sign AND print or type his/her name, date and submit a separate form**

In addition, one BLINDED Conflict of Interest form (no author names used) should be submitted per manuscript with all author disclosures.

John F. Nettrour, MD



09/23/2020

Author Name (Print or Type)

Author Signature

Date
